# Supplementary material for: Replication of a neuroimaging biomarker for striatal dysfunction in psychosis
Source: PubMed Central journal article supplement (PMC10441472; doi:10.21203/rs.3.rs-3185688/v1), 2023-08-07
Supplement: NIHPPrs3185688v1-supplement-1.pdf [file NIHPPrs3185688v1-supplement-1.pdf]

## Supplementary Files

This is a list of supplementary files associated with this preprint. Click to download.

- [SupplementaryInformation.docx](#)
